# Supplementary material
Source: PubMed Central journal article supplement (PMC5470460)
Supplement: jamapsychiatry-e170113-s001.pdf [file jamapsychiatry-e170113-s001.pdf]

## Supplementary Online Content

Martins SS, Sarvet A, Santaella-Tenorio J, Saha T, Grant BF, Hasin DS. Changes in US lifetime heroin use and heroin use disorder prevalence from the 2001-2002 to 2012-2013 National Epidemiologic Survey on Alcohol and Related Conditions. *JAMA Psychiatr*. Published online March 29, 2017. doi:10.1001/jamapsychiatry.2017.0113

**eTable 1.** Heroin Use and Demographic Correlates in the 2001-2002 NESARC and the 2012-2013 NESARC-III

**eTable 2.** DSM-IV Heroin Use Disorder and Demographic Correlates in the 2001-2002 NESARC and the 2012-2013 NESARC-III

This supplementary material has been provided by the authors to give readers additional information about their work.

eTable 1. Heroin Use and Demographic Correlates in the 2001-2002 NESARC and the 2012-2013 NESARC-III

|                                  |                                        | Unadjusted Lifetime Heroin Use   |             |       |              |                                      |             |      |              |
|----------------------------------|----------------------------------------|----------------------------------|-------------|-------|--------------|--------------------------------------|-------------|------|--------------|
|                                  |                                        | 2001-2002 NESARC<br>(n = 43,093) |             |       |              | 2012-2013 NESARC-III<br>(n = 36,309) |             |      |              |
|                                  |                                        | %                                | 95% CI      | PD    | 95% CI       | %                                    | 95% CI      | PD   | 95% CI       |
| <i>Overall</i>                   |                                        | 0.33                             | (0.28-0.40) | NA    | NA           | 1.61                                 | (1.46-1.78) | NA   | NA           |
| <i>Sex</i>                       |                                        |                                  |             |       |              |                                      |             |      |              |
|                                  | <i>Male</i>                            | 0.52                             | (0.42-0.64) | 0.36  | (0.24-0.48)  | 2.41                                 | (2.13-2.73) | 1.55 | (1.22-1.88)  |
|                                  | <i>Female</i>                          | 0.16                             | (0.11-0.24) | REF   |              | 0.86                                 | (0.73-1.02) | REF  |              |
| <i>Race</i>                      |                                        |                                  |             |       |              |                                      |             |      |              |
|                                  | <i>Non-Hispanic White</i>              | 0.34                             | (0.27-0.42) | 0.02  | (-0.1-0.14)  | 1.90                                 | (1.68-2.14) | 0.85 | (0.53-1.18)  |
|                                  | <i>Nonwhite<sup>a</sup></i>            | 0.32                             | (0.24-0.43) | REF   |              | 1.05                                 | (0.86-1.27) | REF  |              |
| <i>Age, y</i>                    |                                        |                                  |             |       |              |                                      |             |      |              |
|                                  | <i>18-29</i>                           | 0.26                             | (0.16-0.44) | -0.09 | (-0.25-0.08) | 1.81                                 | (1.44-2.28) | 0.35 | (-0.12-0.83) |
|                                  | <i>30-44</i>                           | 0.36                             | (0.26-0.49) | 0.01  | (-0.14-0.16) | 1.75                                 | (1.45-2.11) | 0.29 | (-0.13-0.71) |
|                                  | <i>≥45</i>                             | 0.35                             | (0.27-0.45) | REF   |              | 1.46                                 | (1.25-1.7)  | REF  |              |
| <i>Marital Status</i>            |                                        |                                  |             |       |              |                                      |             |      |              |
|                                  | <i>Married or living as married</i>    | 0.23                             | (0.17-0.32) | REF   |              | 1.10                                 | (0.91-1.32) | REF  |              |
|                                  | <i>Widowed, separated, or divorced</i> | 0.48                             | (0.35-0.66) | 0.25  | (0.08-0.43)  | 2.33                                 | (1.98-2.75) | 1.23 | (0.81-1.66)  |
|                                  | <i>Unmarried</i>                       | 0.51                             | (0.35-0.73) | 0.28  | (0.08-0.48)  | 2.29                                 | (1.91-2.74) | 1.19 | (0.71-1.67)  |
| <i>Education</i>                 |                                        |                                  |             |       |              |                                      |             |      |              |
|                                  | <i>Less than High School</i>           | 0.41                             | (0.27-0.62) | 0.12  | (-0.07-0.31) | 2.01                                 | (1.59-2.52) | 0.71 | (0.21-1.21)  |
|                                  | <i>High School</i>                     | 0.39                             | (0.27-0.56) | 0.11  | (-0.05-0.27) | 2.15                                 | (1.8-2.56)  | 0.85 | (0.39-1.31)  |
|                                  | <i>Some College or more</i>            | 0.28                             | (0.22-0.36) | REF   |              | 1.30                                 | (1.11-1.51) | REF  |              |
| <i>Poverty level<sup>b</sup></i> |                                        |                                  |             |       |              |                                      |             |      |              |
|                                  | <i>&lt;100% FPL</i>                    | 0.44                             | (0.27-0.72) | 0.16  | (-0.07-0.39) | 2.42                                 | (2.02-2.9)  | 1.20 | (0.69-1.72)  |
|                                  | <i>100-200% FPL</i>                    | 0.42                             | (0.29-0.62) | 0.14  | (-0.04-0.32) | 1.95                                 | (1.62-2.35) | 0.74 | (0.34-1.13)  |
|                                  | <i>&gt;200% FPL</i>                    | 0.28                             | (0.22-0.36) | REF   |              | 1.22                                 | (1.04-1.43) | REF  |              |
| <i>Urbanicity</i>                |                                        |                                  |             |       |              |                                      |             |      |              |
|                                  | <i>Rural</i>                           | 0.23                             | (0.13-0.41) | REF   |              | 1.28                                 | (0.97-1.69) | REF  |              |
|                                  | <i>Urban</i>                           | 0.36                             | (0.29-0.44) | 0.12  | (-0.03-0.27) | 1.70                                 | (1.53-1.88) | 0.42 | (0.02-0.81)  |

| <i>Region</i> |                  |      |             |       |              |      |             |      |              |
|---------------|------------------|------|-------------|-------|--------------|------|-------------|------|--------------|
|               | <i>Northeast</i> | 0.38 | (0.24-0.6)  | REF   |              | 1.54 | (1.18-2)    | REF  |              |
|               | <i>Midwest</i>   | 0.22 | (0.14-0.35) | -0.16 | (-0.36-0.04) | 1.54 | (1.21-1.95) | 0.00 | (-0.54-0.54) |
|               | <i>South</i>     | 0.32 | (0.23-0.45) | -0.06 | (-0.26-0.15) | 1.60 | (1.36-1.88) | 0.06 | (-0.42-0.54) |
|               | <i>West</i>      | 0.42 | (0.31-0.59) | 0.05  | (-0.18-0.27) | 1.74 | (1.48-2.05) | 0.21 | (-0.29-0.7)  |

Abbreviations: FPL, federal poverty level; NA, not applicable; NESARC, National Epidemiologic Survey on Alcohol and Related Conditions; PD, Prevalence Difference

<sup>a</sup>Nonwhites include non-Hispanic black, Hispanic, Asian or Pacific Islanders, or Native American

<sup>b</sup>Determined by family income and family size using the federal poverty guidelines published annually by the U.S. Department of Health and Human Services. Individuals or families making less than 100% of the FPL are considered to be below the poverty level.

eTable 2. DSM-IV Heroin Use Disorder and Demographic Correlates in the 2001-2002 NESARC and the 2012-2013 NESARC-III

|                                        | Unadjusted Lifetime DSM-IV Heroin Use Disorder <sup>a</sup> |             |       |              |                                      |             |      |              |
|----------------------------------------|-------------------------------------------------------------|-------------|-------|--------------|--------------------------------------|-------------|------|--------------|
|                                        | 2001-2002 NESARC<br>(n = 43,093)                            |             |       |              | 2012-2013 NESARC-III<br>(n = 36,309) |             |      |              |
|                                        | %                                                           | 95% CI      | PD    | 95% CI       | %                                    | 95% CI      | PD   | 95% CI       |
| <i>Overall</i>                         | 0.21                                                        | (0.17-0.27) | NA    | NA           | 0.69                                 | (0.58-0.81) | NA   | NA           |
| <i>Sex</i>                             |                                                             |             |       |              |                                      |             |      |              |
| <i>Male</i>                            | 0.32                                                        | (0.25-0.42) | 0.21  | (0.12-0.31)  | 1.04                                 | (0.84-1.28) | 0.68 | (0.44-0.91)  |
| <i>Female</i>                          | 0.11                                                        | (0.07-0.18) | REF   |              | 0.36                                 | (0.28-0.46) | REF  |              |
| <i>Race</i>                            |                                                             |             |       |              |                                      |             |      |              |
| <i>Non-Hispanic White</i>              | 0.19                                                        | (0.14-0.26) | -0.06 | (-0.16-0.04) | 0.82                                 | (0.67-1)    | 0.38 | (0.16-0.6)   |
| <i>Nonwhite<sup>b</sup></i>            | 0.25                                                        | (0.18-0.36) | REF   |              | 0.43                                 | (0.32-0.6)  | REF  |              |
| <i>Age, y</i>                          |                                                             |             |       |              |                                      |             |      |              |
| 18-29                                  | 0.21                                                        | (0.12-0.37) | -0.01 | (-0.15-0.13) | 1.01                                 | (0.72-1.41) | 0.49 | (0.13-0.86)  |
| 30-44                                  | 0.20                                                        | (0.13-0.3)  | -0.02 | (-0.13-0.08) | 0.77                                 | (0.59-0.99) | 0.25 | (0.03-0.47)  |
| ≥45                                    | 0.22                                                        | (0.16-0.31) | REF   |              | 0.51                                 | (0.4-0.66)  | REF  |              |
| <i>Marital Status</i>                  |                                                             |             |       |              |                                      |             |      |              |
| <i>Married or living as married</i>    | 0.13                                                        | (0.08-0.19) | REF   |              | 0.38                                 | (0.28-0.52) | REF  |              |
| <i>Widowed, separated, or divorced</i> | 0.30                                                        | (0.21-0.44) | 0.18  | (0.05-0.3)   | 0.88                                 | (0.69-1.11) | 0.50 | (0.28-0.71)  |
| <i>Unmarried</i>                       | 0.38                                                        | (0.25-0.58) | 0.25  | (0.08-0.42)  | 1.30                                 | (1-1.69)    | 0.92 | (0.55-1.3)   |
| <i>Education</i>                       |                                                             |             |       |              |                                      |             |      |              |
| <i>Less than High School</i>           | 0.24                                                        | (0.14-0.41) | 0.08  | (-0.06-0.22) | 0.87                                 | (0.6-1.25)  | 0.40 | (0.08-0.72)  |
| <i>High School</i>                     | 0.29                                                        | (0.18-0.44) | 0.12  | (-0.01-0.26) | 1.11                                 | (0.86-1.43) | 0.64 | (0.34-0.95)  |
| <i>Some College or more</i>            | 0.16                                                        | (0.11-0.23) | REF   |              | 0.47                                 | (0.37-0.6)  | REF  |              |
| <i>Poverty level<sup>f</sup></i>       |                                                             |             |       |              |                                      |             |      |              |
| <100% FPL                              | 0.40                                                        | (0.24-.68)  | 0.25  | (0.03-0.47)  | 1.14                                 | (0.87-1.49) | 0.64 | (0.31-0.97)  |
| 100-200% FPL                           | 0.26                                                        | (0.17-0.41) | 0.11  | (-0.01-0.24) | 0.79                                 | (0.59-1.07) | 0.29 | (0.06-0.53)  |
| >200% FPL                              | 0.15                                                        | (0.11-0.21) | REF   |              | 0.50                                 | (0.39-0.64) | REF  |              |
| <i>Urbanicity</i>                      |                                                             |             |       |              |                                      |             |      |              |
| <i>Rural</i>                           | 0.13                                                        | (0.06-0.25) | REF   |              | 0.53                                 | (0.34-0.83) | REF  |              |
| <i>Urban</i>                           | 0.23                                                        | (0.18-0.3)  | 0.11  | (0-0.21)     | 0.73                                 | (0.61-0.86) | 0.19 | (-0.06-0.45) |

| <i>Region</i> |                  |      |             |       |              |  |      |             |                    |
|---------------|------------------|------|-------------|-------|--------------|--|------|-------------|--------------------|
|               | <i>Northeast</i> | 0.25 | (0.13-0.47) | REF   |              |  | 0.77 | (0.51-1.14) | REF                |
|               | <i>Midwest</i>   | 0.14 | (0.08-0.23) | -0.11 | (-0.28-0.06) |  | 0.71 | (0.5-1.02)  | -0.05 (-0.45-0.34) |
|               | <i>South</i>     | 0.23 | (0.16-0.34) | -0.02 | (-0.2-0.16)  |  | 0.71 | (0.55-0.91) | -0.06 (-0.41-0.29) |
|               | <i>West</i>      | 0.22 | (0.14-0.34) | -0.03 | (-0.21-0.15) |  | 0.57 | (0.39-0.83) | -0.20 (-0.57-0.17) |

Abbreviations: FPL, federal poverty level; NA, not applicable; NESARC, National Epidemiologic Survey on Alcohol and Related Conditions; PD, Prevalence Difference

<sup>a</sup>DSM-IV heroin use disorder refers to DSM-IV drug abuse or dependence.

<sup>b</sup>Nonwhites include non-Hispanic black, Hispanic, Asian or Pacific Islanders, or Native American

<sup>c</sup>Determined by family income and family size using the federal poverty guidelines published annually by the U.S. Department of Health and Human Services. Individuals or families making less than 100% of the FPL are considered to be below the poverty level.
